# Supplementary material for: Serpent/dGATAb regulates Laminin B1 and Laminin B2 expression during Drosophila embryogenesis
Source: PubMed Central journal article supplement (PMC6828711; doi:10.1038/s41598-019-52210-9), 2019-11-04
Supplement: 41598_2019_52210_MOESM1_ESM.pdf [file 41598_2019_52210_MOESM1_ESM.pdf]

## **Serpent/dGATAb regulates *Laminin B1* and *Laminin B2* expression during *Drosophila* embryogenesis**

Uwe Toepfer<sup>1, 2</sup> (ORCID: 0000-0003-0278-6580), Maik C. Bischoff<sup>1, 3</sup> (ORCID: 0000-0002-6995-8159), Marek Bartkuhn<sup>4</sup> (ORCID: 0000-0001-6872-9082), and Anne Holz<sup>1, #</sup> (ORCID: 0000-0002-7028-6548)

<sup>1</sup> Justus-Liebig-Universitaet Giessen, Institut fuer Allgemeine und Spezielle Zoologie, Allgemeine Zoologie und Entwicklungsbiologie, Stephanstrasse 24, 35390 Giessen, Germany.

<sup>2</sup> Present address: Technische Universitaet Dresden, Institut fuer Genetik, Zellescher Weg 20b, 01217 Dresden, Germany.

<sup>3</sup> Present address: Philipps-Universitaet Marburg, AG Entwicklungsbiologie der Tiere, Karl-von-Frisch-Strasse 8, 35043 Marburg, Germany.

<sup>4</sup> Justus-Liebig-Universitaet Giessen, Institut fuer Genetik, Heinrich-Buff-Ring 58-62, 35392 Giessen, Germany.

# Correspondence should be send to: [anne.holz@allzool.bio.uni-giessen.de](mailto:anne.holz@allzool.bio.uni-giessen.de)

## Supplementary Table, Figures and Figure Legends

**Supplementary Table S1: GFP-Expression in *LanB1/LanB2* reporter constructs compared to previously published *LanB1* and *LanB2* mRNA expression.**

| Tissue                                  | <i>LanB1</i><br><i>mRNA</i> | LanB1<br>5'-GFP | LanB1<br>3'-GFP | <i>LanB2</i><br><i>mRNA</i> | LanB2<br>5'-GFP | LanB2<br>3'-GFP |
|-----------------------------------------|-----------------------------|-----------------|-----------------|-----------------------------|-----------------|-----------------|
| Yolk sac                                |                             |                 | X               | X                           |                 | X               |
| Early mesoderm                          | X                           | X               |                 | X                           | X               |                 |
| Amnioserosa                             |                             | X               |                 |                             | X               |                 |
| Hemocytes                               | X                           |                 | X               | X                           | X               | X               |
| Fat body                                | X                           |                 | X               | X                           | X               | X               |
| Somatic muscles                         | X                           | X               |                 | X                           | X               |                 |
| Visceral muscles<br>(fore- and hindgut) | X                           | X               |                 | X                           |                 | X               |
| Visceral muscles<br>(midgut)            | X                           | X               |                 | X                           |                 | X               |
| AMP and PMG                             | X                           |                 | X               | X                           | X               |                 |
| Dorsal median cells                     | X                           |                 | X               | X                           |                 | X               |
| Salivary Glands/<br>Malpighian Tubules  |                             |                 | X<br>X          |                             |                 |                 |

*LanB1* and *LanB2* mRNA expression depends on Montell and Goodman (1989), while *LanB2* mRNA distribution is also derived from Wolfstetter and Holz (2012).

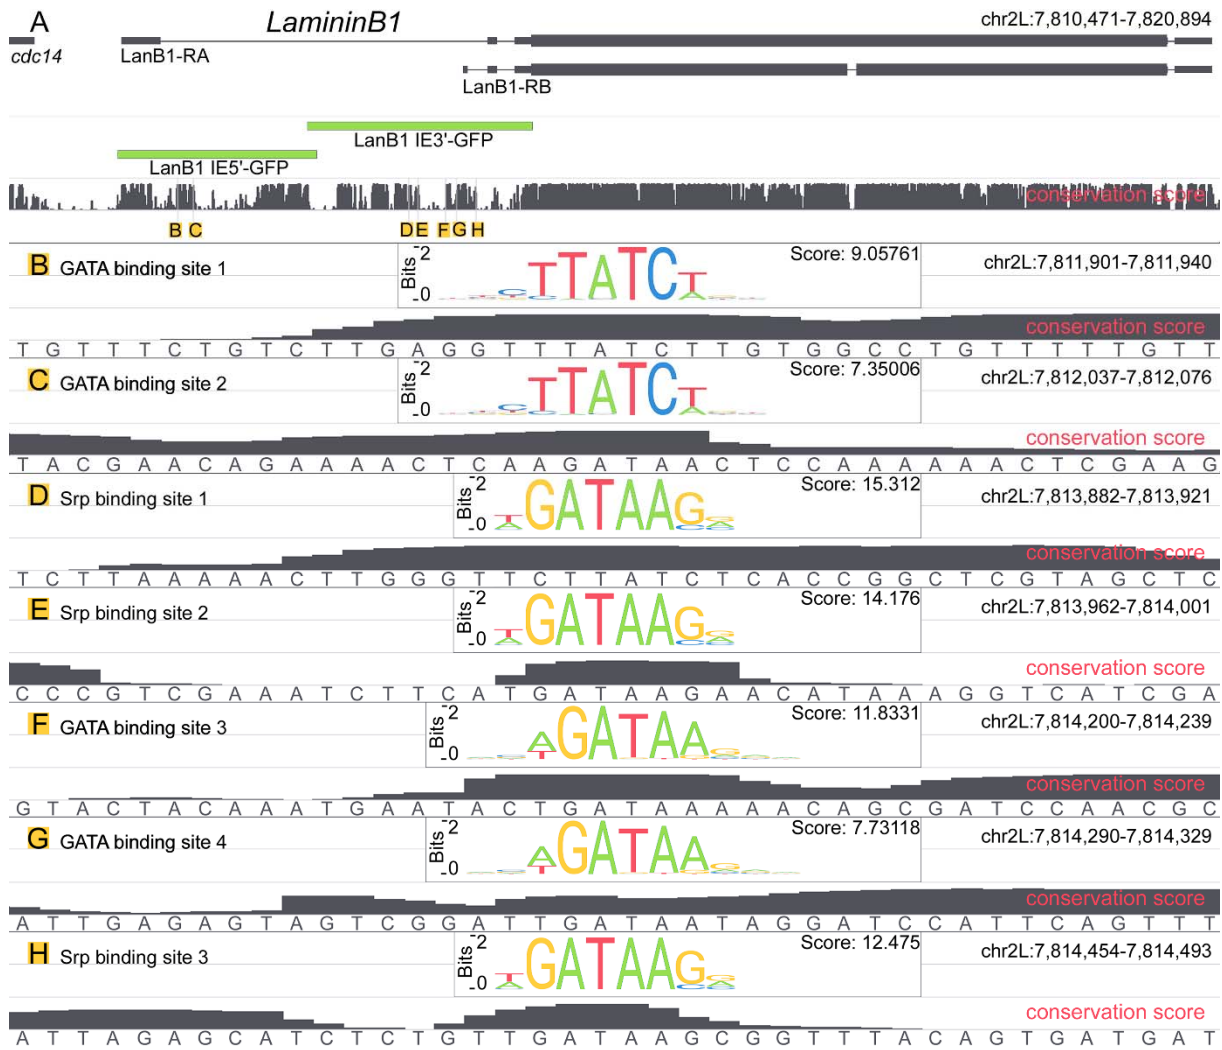

**Supplementary Figure S1: Gene locus of *LanB1* with reporter gene constructs and predicted TFBSs. (A)** Schematic representation of *LanB1* transcripts, derived reporter gene constructs (green) and conservation score (red) of the genomic region with predicted TFBSs. **(B-H)** Predicted TFBSs of either GATA- or Srp-binding sites with position frequency matrices (colored letters) and enrichment scores (boxes), conservation scores and accompanying DNA sequence.

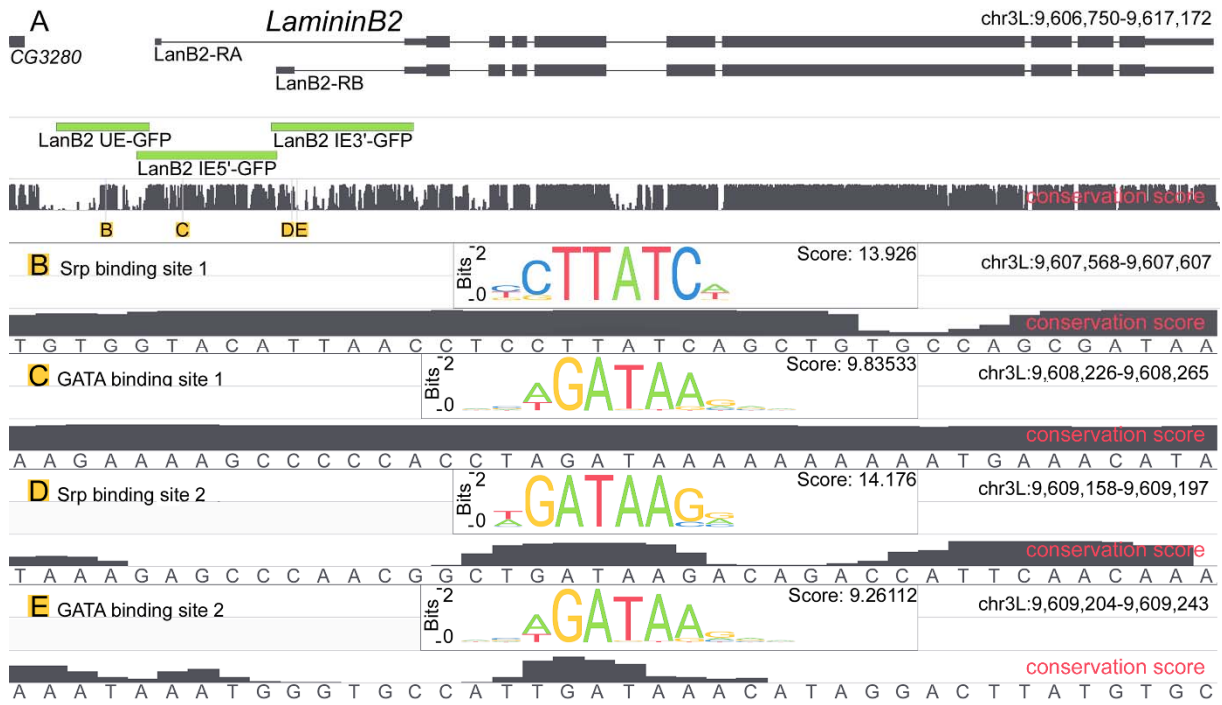

**Supplementary Figure S2: Gene locus of *LanB2* with reporter gene constructs and predicted TFBSs.** (A) Schematic representation of *LanB2* transcripts, derived reporter gene constructs (green) and conservation score (red) of the genomic region with predicted TFBSs. (B-E) Predicted TFBSs of either GATA- or Srp-binding sites with position frequency matrices (colored letters) and enrichment scores (boxes), conservation scores and accompanying DNA sequence.

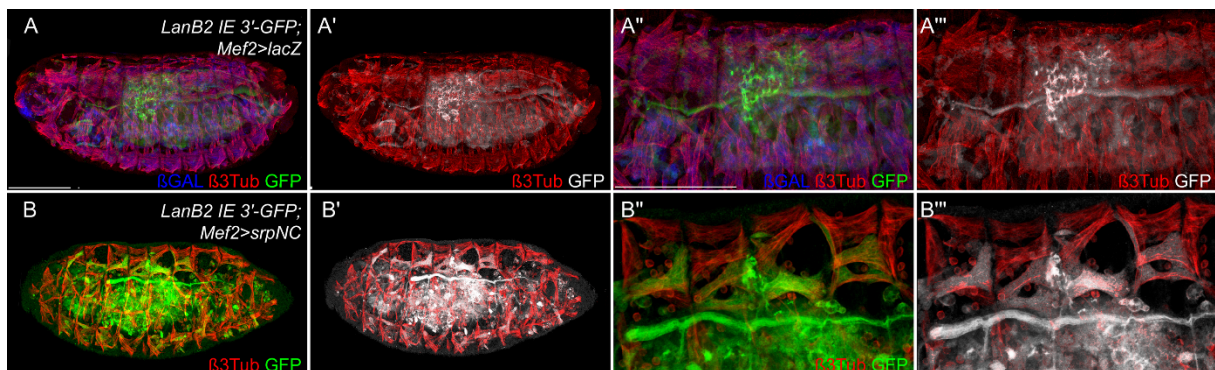

**Supplementary Figure S3: Myogenic *srp* expression leads to ectopic *Laminin B2* reporter activation and disrupted myogenesis.** (A-A''') Control animals show GFP-reporter gene expression of *LanB2 IE 3'* (A, A'' in green, A', A''' white) and *Mef2-GAL4* driven *UAS-lacZ* activity (A, A'' blue), with anti- $\beta$ 3Tubulin as muscle marker (red). (B-B''') Ectopic expression of *UAS-srpNC* with *Mef2-GAL4* is sufficient for *Laminin* reporter gene activation in somatic muscles and unfused myoblasts, leading to disrupted myogenesis. GFP reporter gene expression (B, B'' green; B', B''' white) and anti- $\beta$ 3Tubulin (red). Scale bars = 100  $\mu$ m.
